# Supplementary material for: The allergic march comprises the coexistence of related patterns of allergic disease not just the progressive development of one disease
Source: PubMed Central journal article supplement — Acta Paediatr. 2016 Jul 28;105(12):1472–9. doi: 10.1111/apa.13515 (PMC5129460; doi:10.1111/apa.13515), 2016-07-28

### Eczema at 8 years

Increased risk

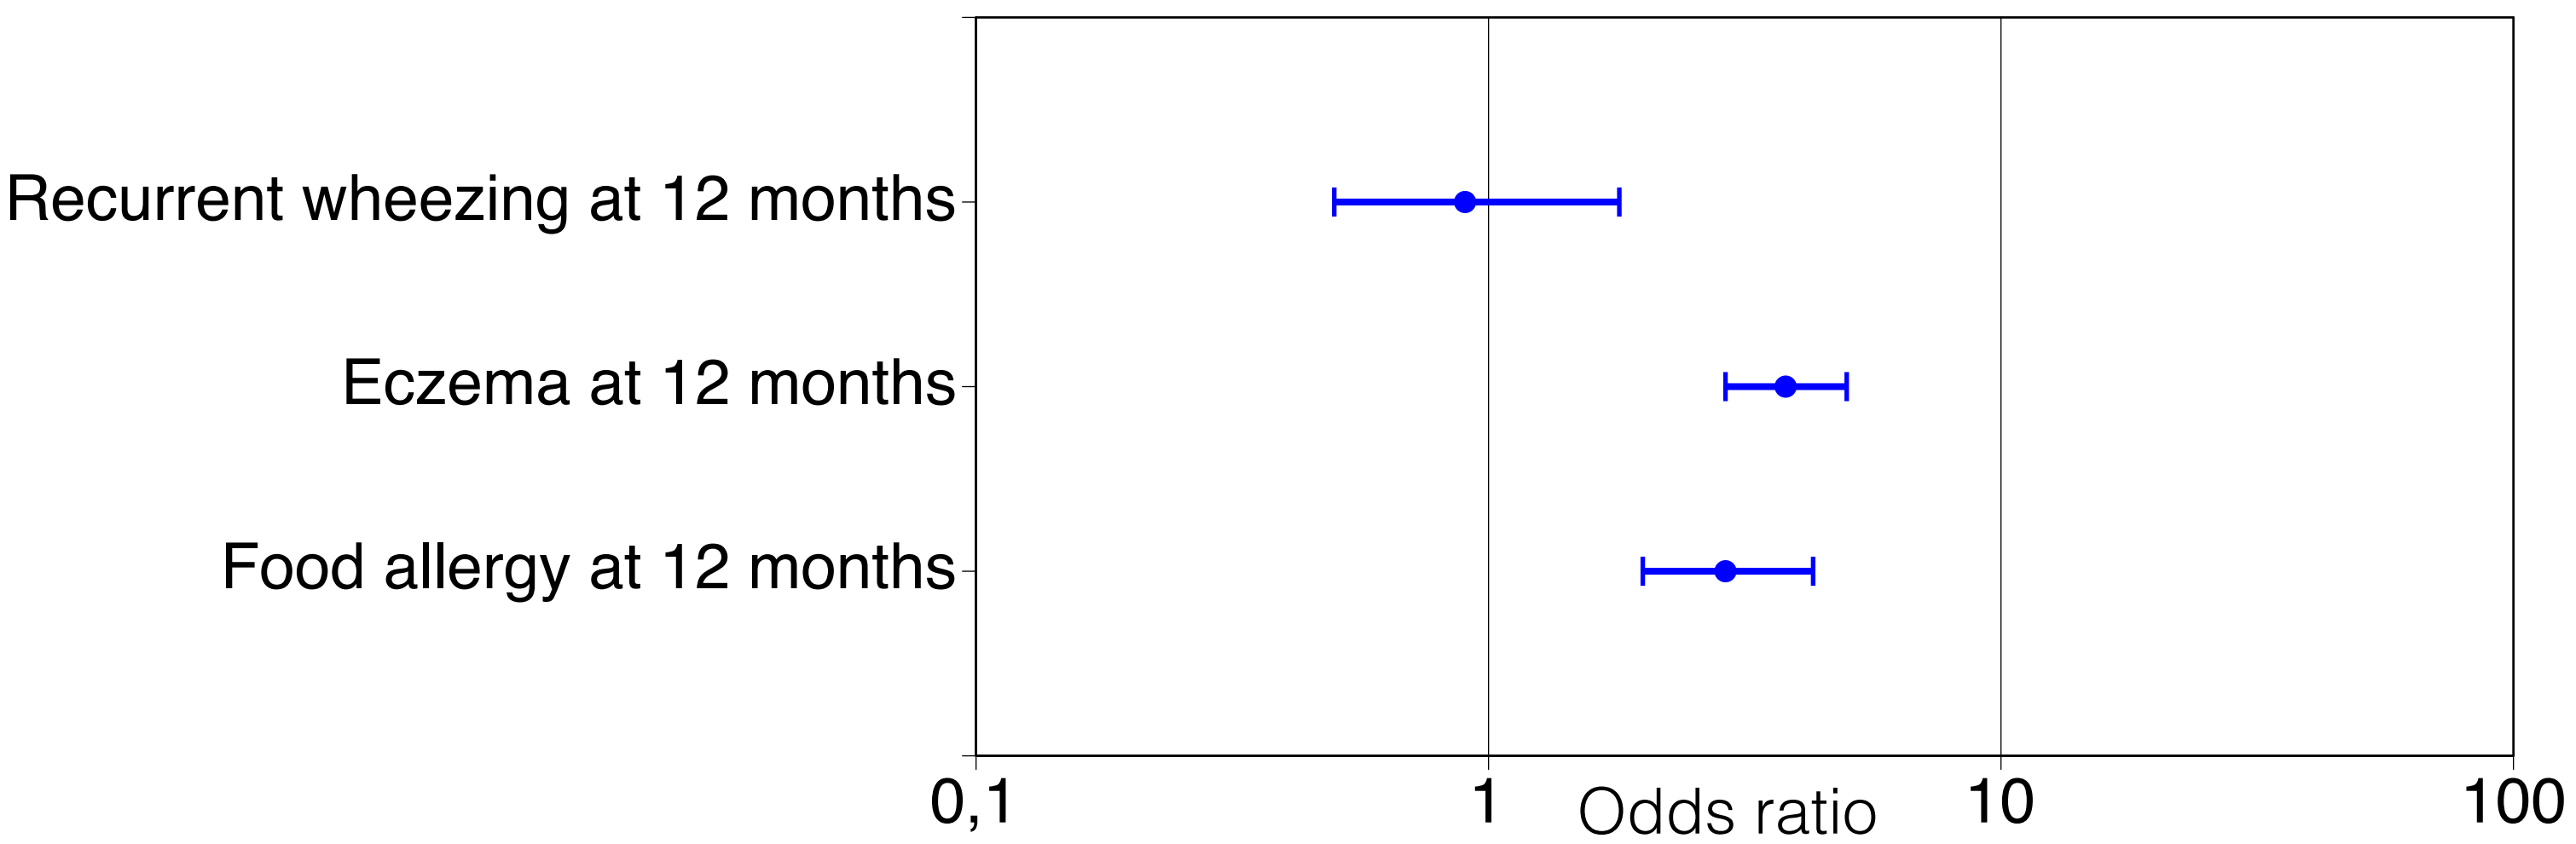

### Asthma at 8 years

Increased risk

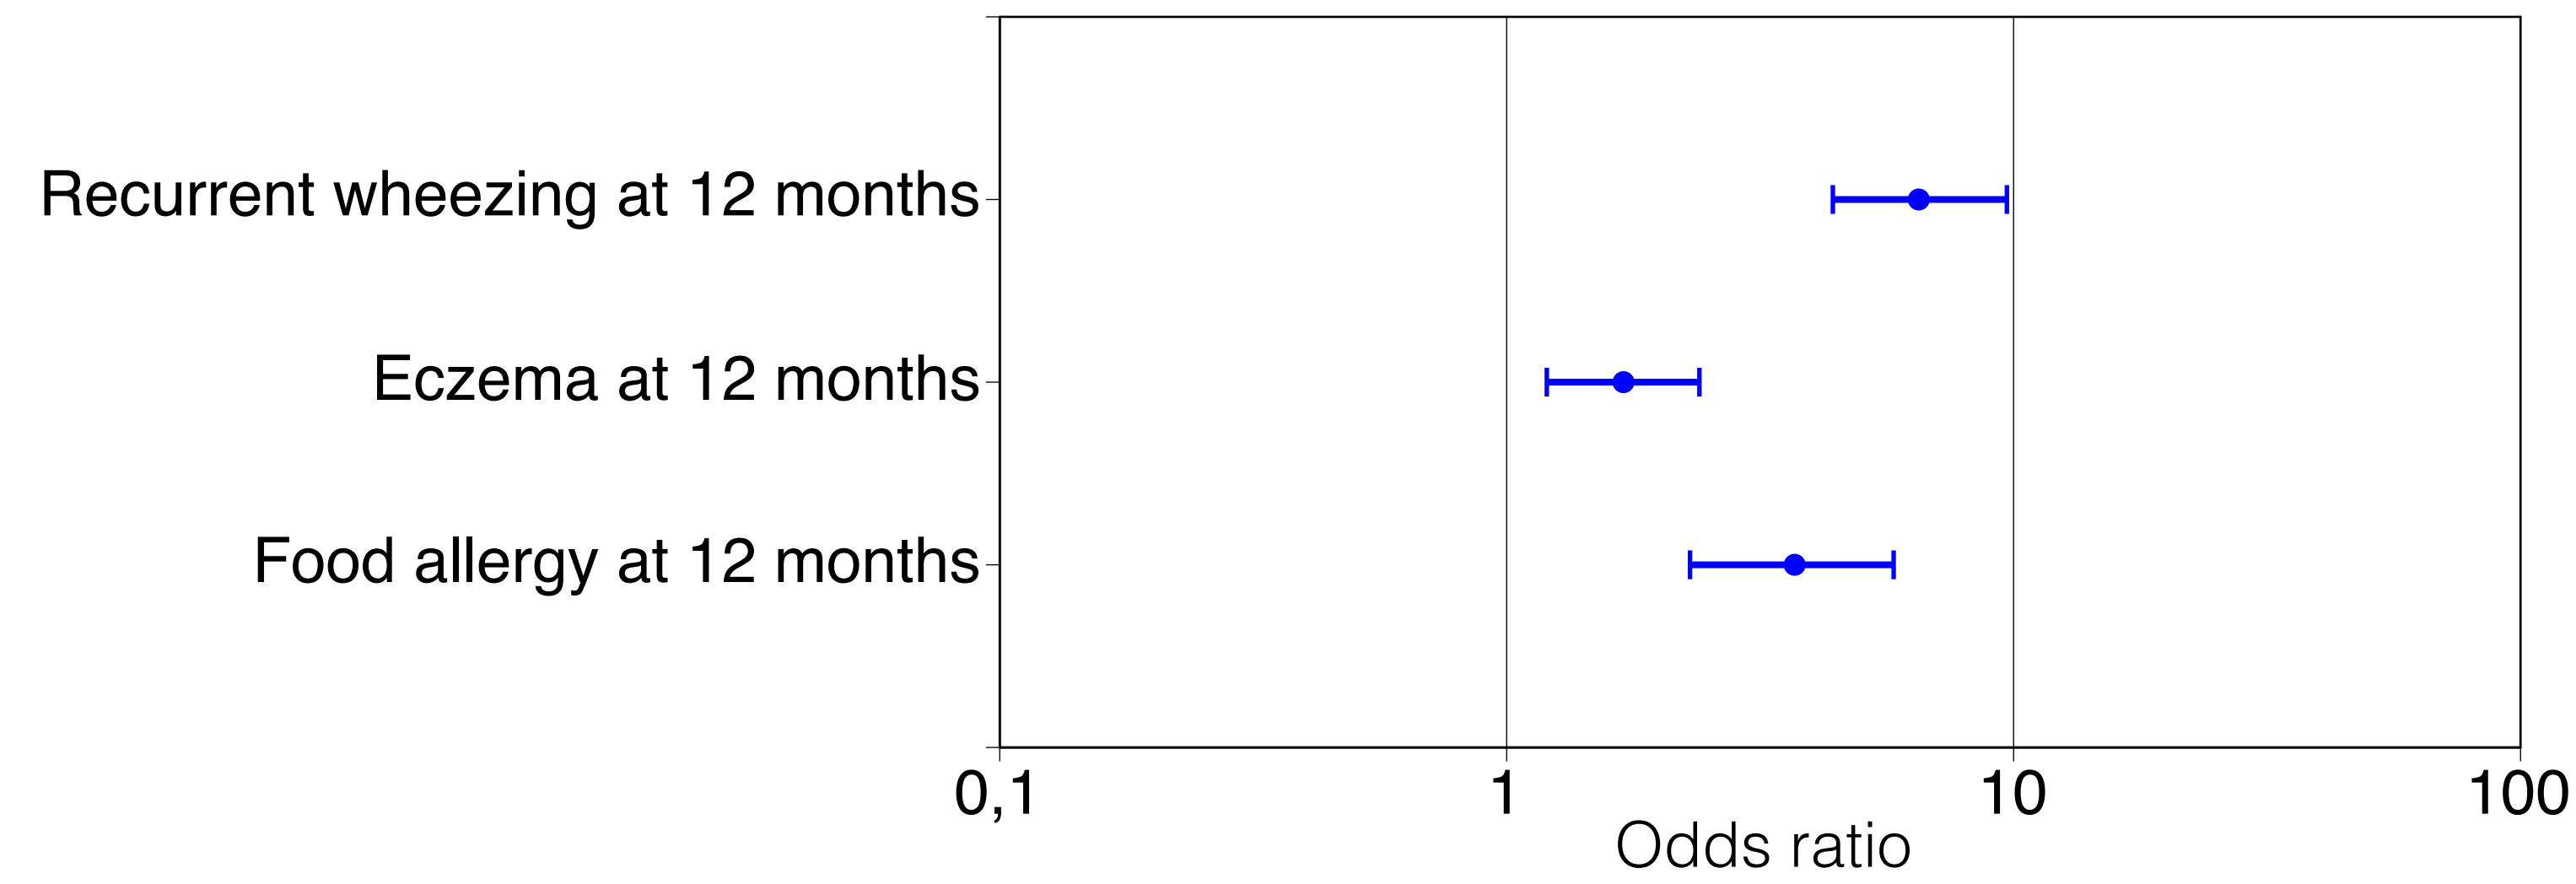

### Food allergy at 8 years

Increased risk

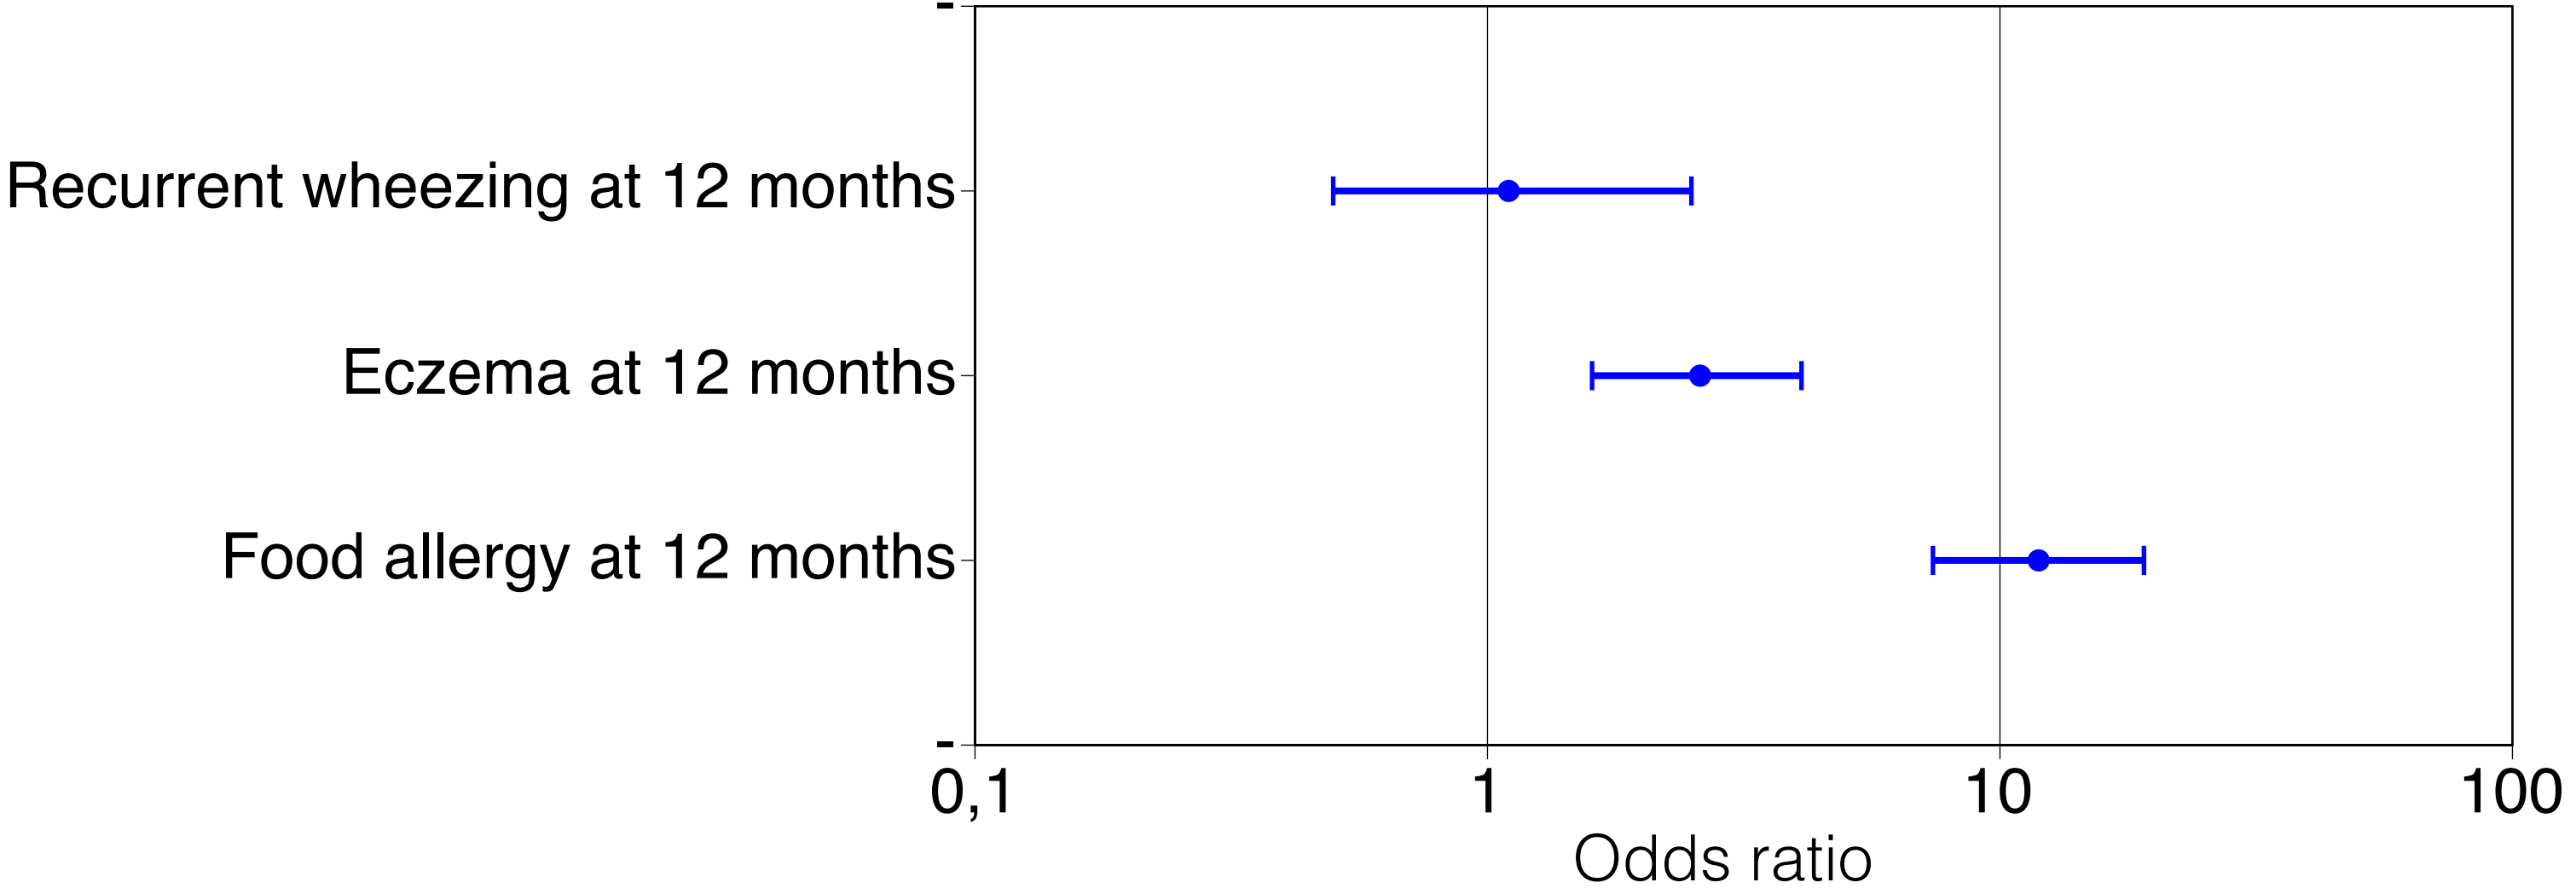

### Rhinitis at 8 years

Increased risk

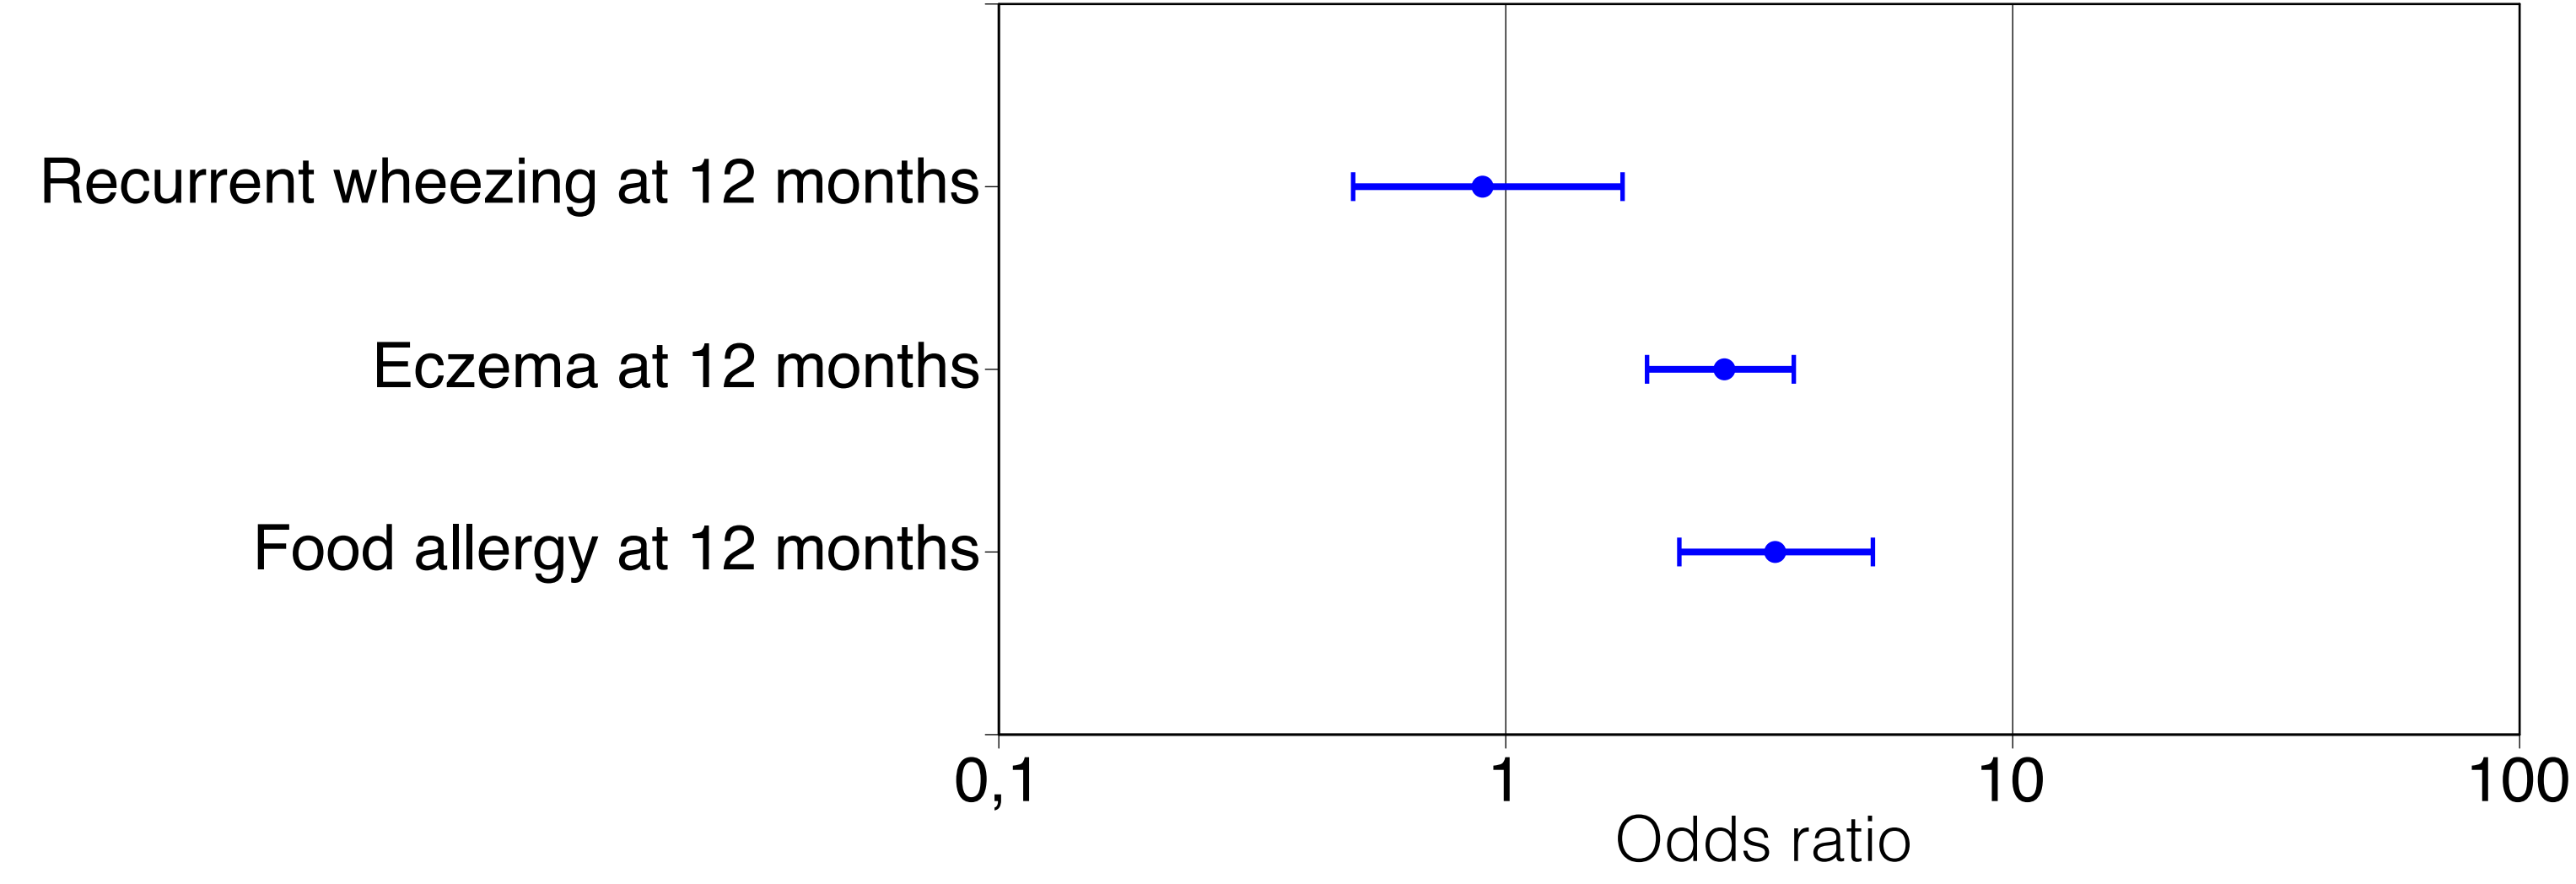

Supplement: APA-105-1472-s002.pdf [file APA-105-1472-s002.pdf]
