# Supplementary figures and images for: The allergic march comprises the coexistence of related patterns of allergic disease not just the progressive development of one disease
Source: PubMed Central journal article supplement — Acta Paediatr. 2016 Jul 28;105(12):1472–9. doi: 10.1111/apa.13515 (PMC5129460; doi:10.1111/apa.13515), 2016-07-28

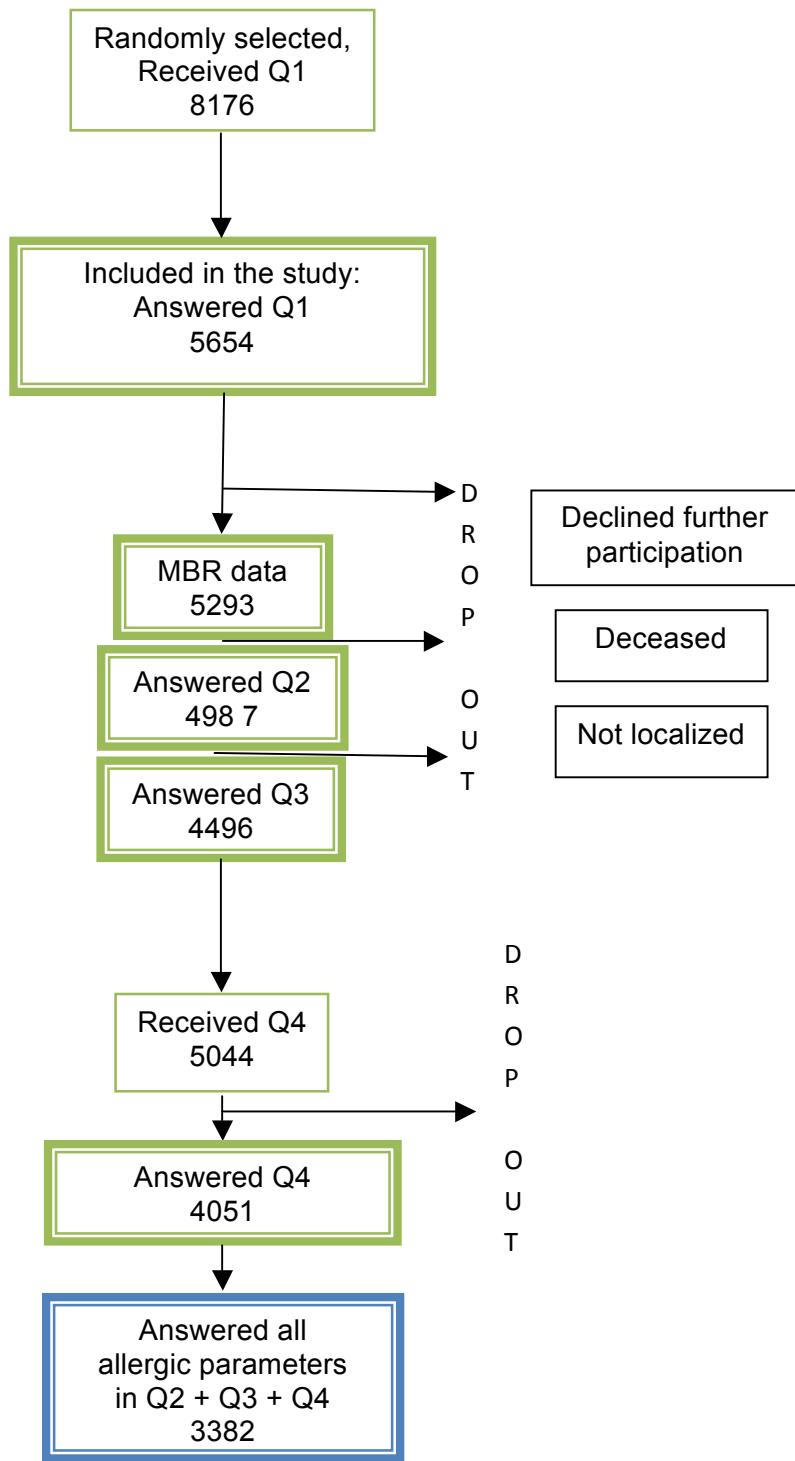

Supplement: APA-105-1472-s001.pdf [file APA-105-1472-s001.pdf]

**Age of onset of allergic diseases**

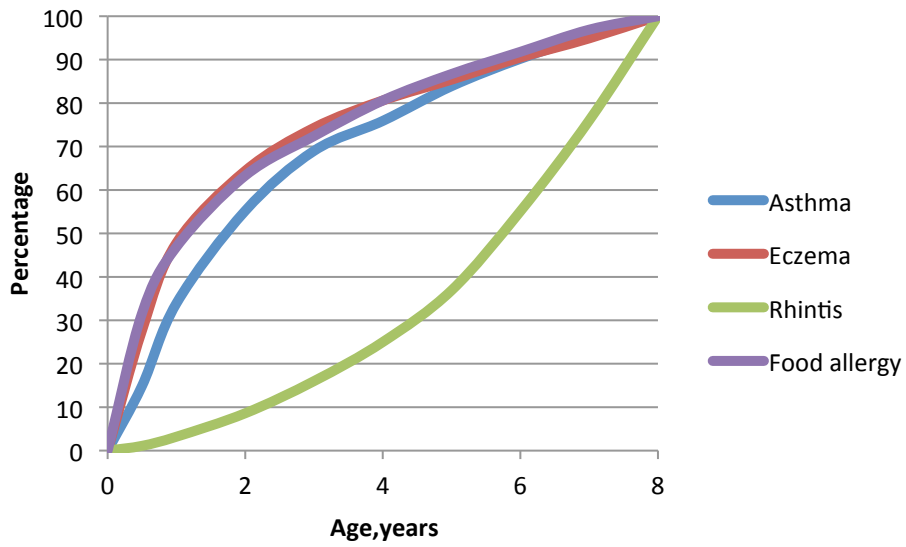

Supplement: APA-105-1472-s003.pdf [file APA-105-1472-s003.pdf]
